# Supplementary material
Source: PubMed Central journal article supplement (PMC4679683)

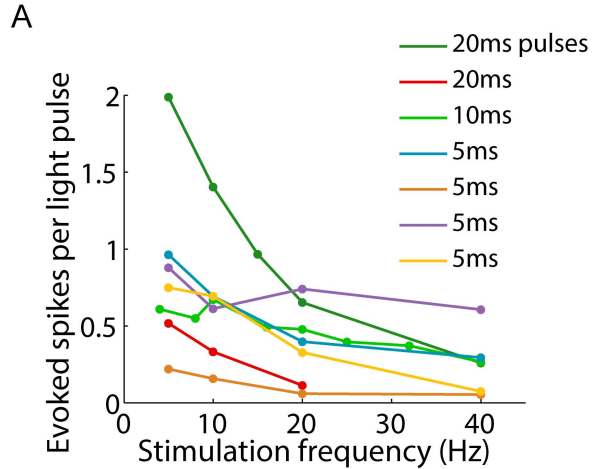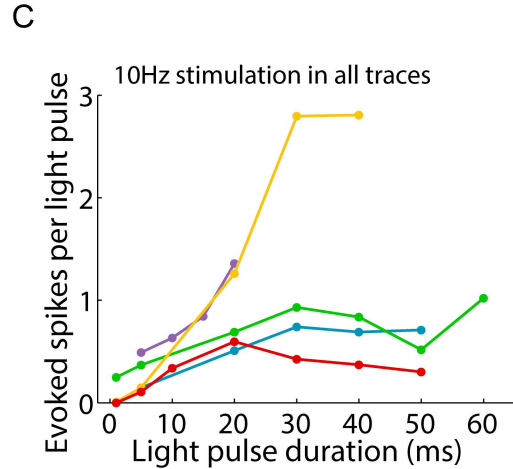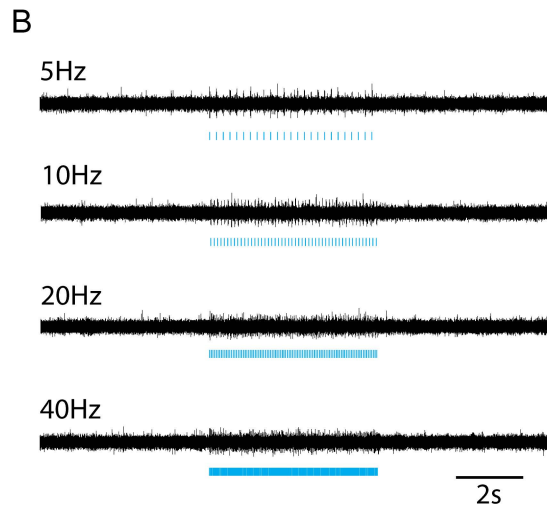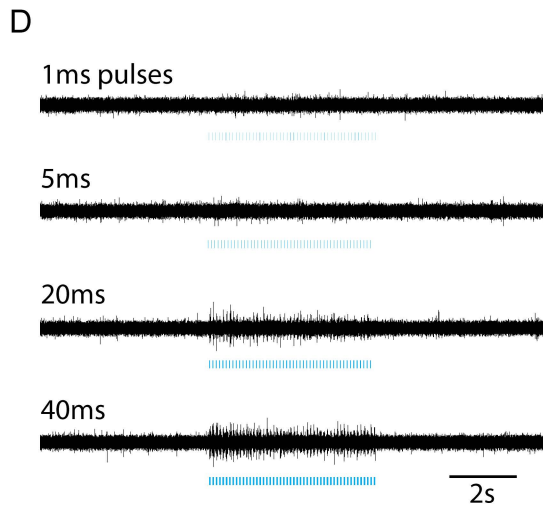

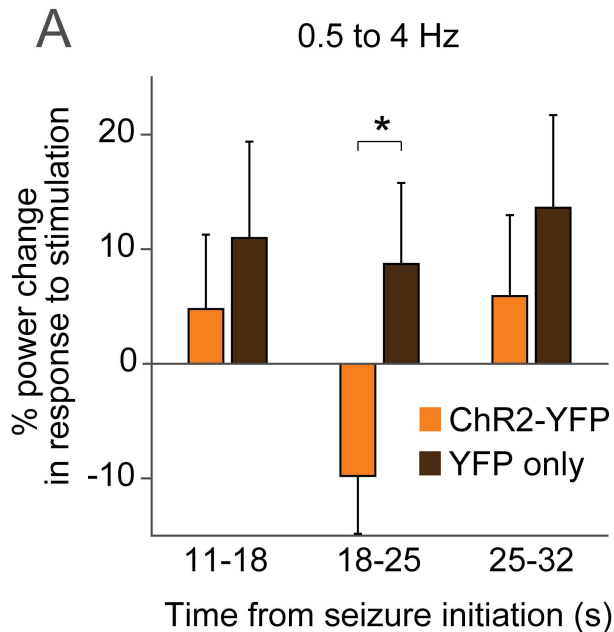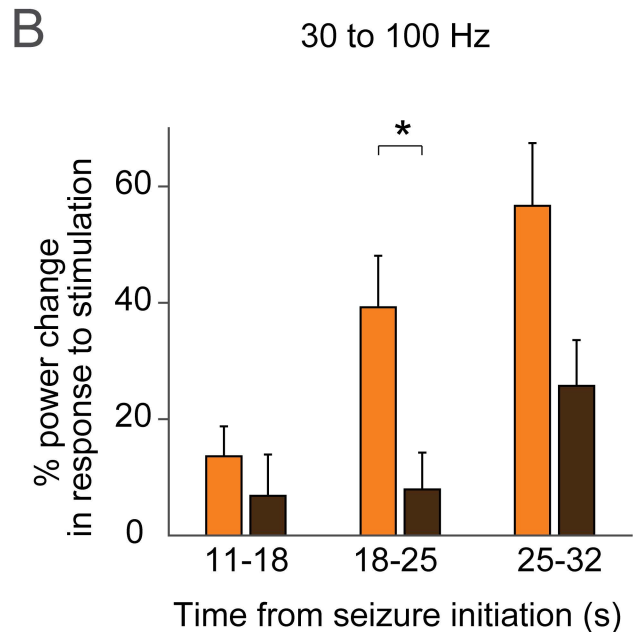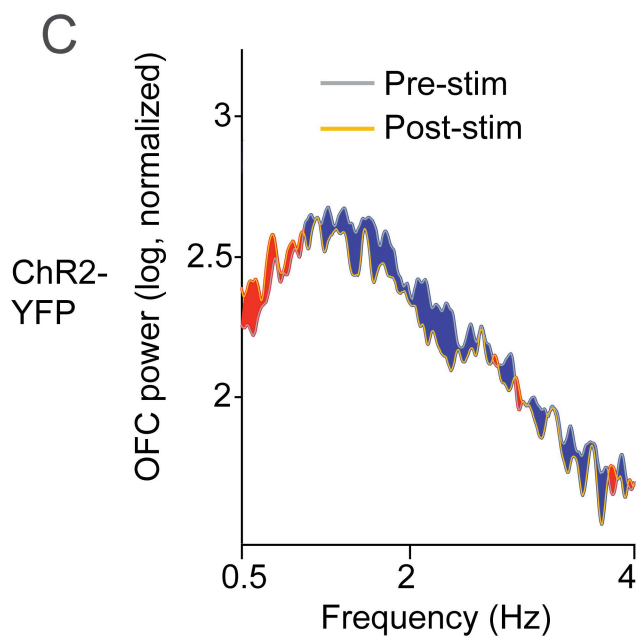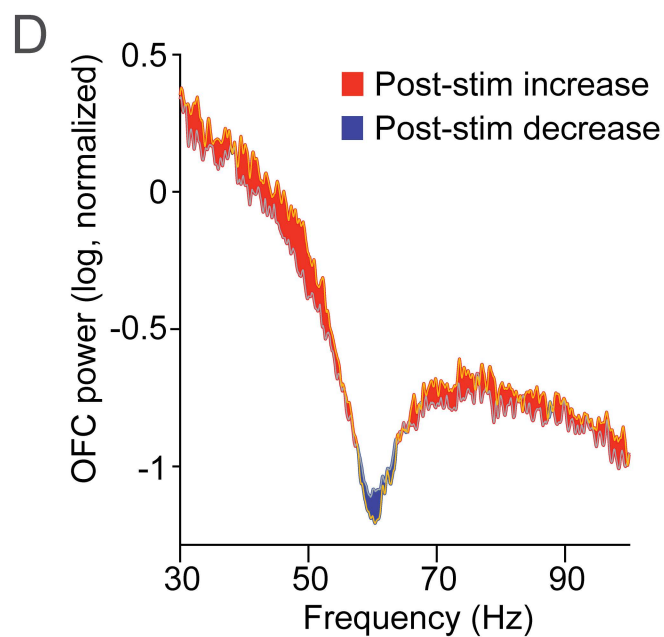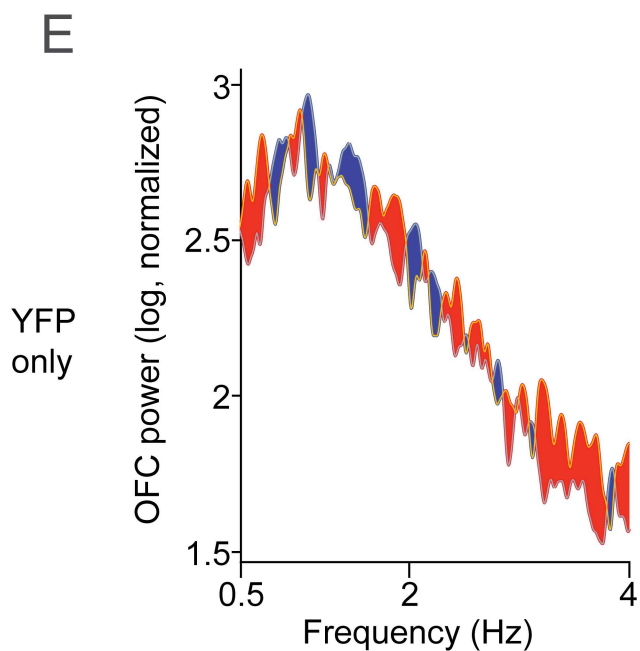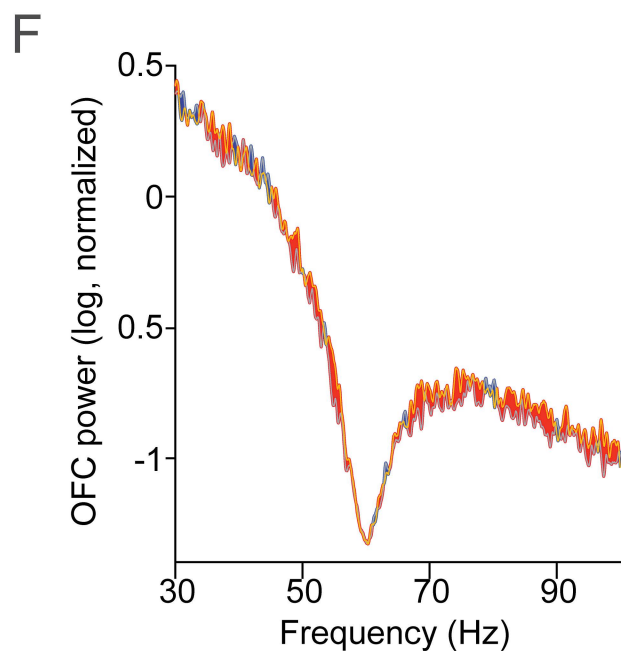

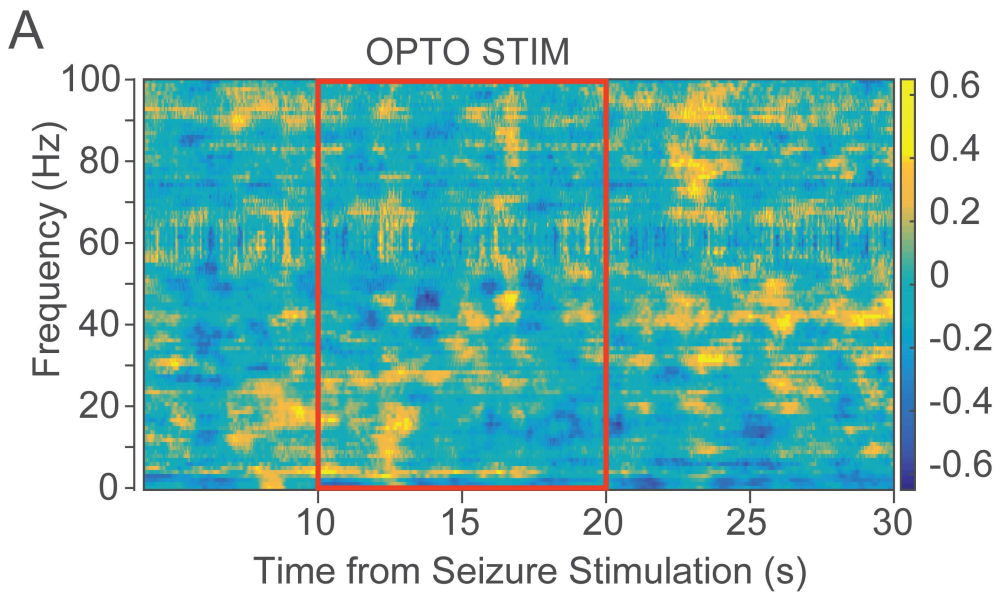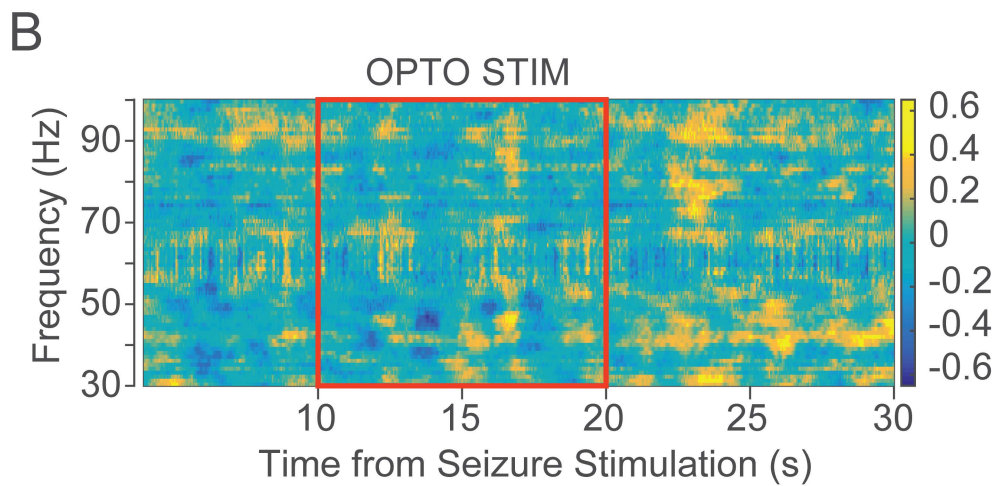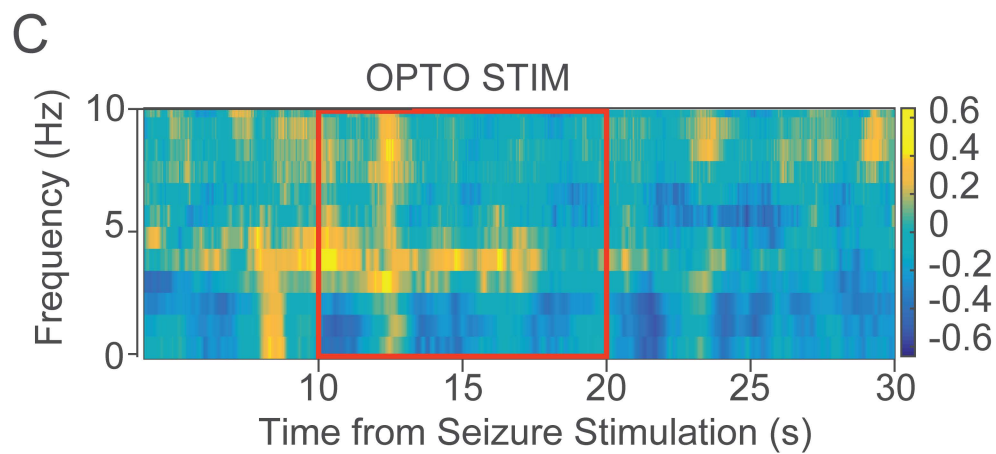

Supplement: NIHMS726135-supplement-Supp_FigureS1-S3.pdf [file NIHMS726135-supplement-Supp_FigureS1-S3.pdf]
